1                   **Altered Nucleoprotein Binding to Influenza Virus RNA**  
2                   **Impacts Packaging Efficiency and Replication**

3  
4  
5                   Running title: Flexibility of Influenza Virus Nucleoprotein Binding to Viral RNA  
6  
7

8                   Valerie Le Sage, Jack P. Kanarek, Eric Nturibi, Adalena V. Nanni, Dan J. Snyder,  
9                   Vaughn S. Cooper, Seema S. Lakdawala\*, Nara Lee\*

10  
11  
12  
13                   University of Pittsburgh School of Medicine  
14                   Department of Microbiology and Molecular Genetics  
15                   450 Technology Drive, Pittsburgh, PA 15219, USA  
16  
17  
18  
19  
20  
21

22                   \* To whom correspondence should be addressed.

23                   Email: [nara.lee@pitt.edu](mailto:nara.lee@pitt.edu); [lakdawala@pitt.edu](mailto:lakdawala@pitt.edu)

24 **Abstract**

25           The genome of Influenza A viruses consists of eight negative-sense RNA segments that  
26 are bound by viral nucleoprotein (NP). We recently showed that NP binding is not uniform along  
27 the segments but exhibits regions of enrichment as well as depletion. Furthermore, genome-wide  
28 NP binding profiles are distinct even in strains with high sequence similarity, such as the two  
29 H1N1 strains A/WSN/1933 and A/California/07/2009. Here, we performed interstrain segment  
30 swapping experiments with segments of either high or low congruency in NP binding, which  
31 suggested that a segment with a similar overall NP binding profile preserved replication fitness of  
32 the resulting virus. Further sub-segmental swapping experiments demonstrated that NP binding  
33 is affected by changes to the underlying nucleotide sequence, as NP peaks can either become  
34 lost or appear *de novo* at mutated regions. Unexpectedly, these local nucleotide changes in one  
35 segment not only affect NP binding *in cis*, but also impact the genome-wide NP binding profile on  
36 other segments in a vRNA sequence-independent manner, suggesting that primary sequence  
37 alone is not the sole determinant for NP association to vRNA. Moreover, we observed that sub-  
38 segmental mutations that affect NP binding profiles can result in reduced replication fitness, which  
39 is caused by defects in vRNA packaging efficiency and an increase in semi-infectious particle  
40 production. Taken together, our results indicate that the pattern of NP binding to vRNA is  
41 important for efficient virus replication.

42 **Author Summary**

43           Each viral RNA (vRNA) segment is bound by the polymerase complex at the 5' and 3'  
44 ends, while the remainder of the vRNA is coated non-uniformly and non-randomly by  
45 nucleoprotein (NP). To explore the constraints of NP binding to vRNA, we used high-throughput  
46 sequencing of RNA isolated by crosslinking immunoprecipitation (HITS-CLIP) of mutant H1N1  
47 strains with exchanged vRNA sequences and observed that NP binding can be changed based  
48 on vRNA sequence. The most striking observation of our study is that nucleotide changes in one  
49 segment can have genome-wide effects on the NP binding profile of other segments. We refer to  
50 this phenomenon as the 'butterfly effect' of influenza packaging. Our results provide an important  
51 context in which to consider future studies regarding influenza packaging and assembly.

## 52 Introduction

53 The segmented nature of influenza A virus (IAV) genomes poses a logistical challenge for  
54 viral replication, as all of the eight negative-sense single-stranded RNA segments must find their  
55 way into a budding virion to give rise to an infectious particle [1, 2]. Following nuclear export, viral  
56 ribonucleoprotein complexes (vRNP) containing newly synthesized viral RNA (vRNA) assemble  
57 on recycling endosomes en route to the plasma membrane for packaging into virions [3, 4]. An  
58 accumulating body of evidence suggests that the intracellular pre-assembly process of vRNP  
59 trafficking is mediated by RNA-RNA interactions between segments [5-10], which is substantiated  
60 by *in vitro* RNA binding studies indicating that multiple sites within vRNA segments form RNA-  
61 RNA interactions [8, 11]. Further support for these intersegmental interactions comes from  
62 colocalization studies during intracellular viral assembly that showed that segments colocalize  
63 with certain other segments preferentially during their transport to the plasma membrane [3, 4].

64 All eight IAV segments are coated by viral nucleoprotein (NP) molecules, which until  
65 recently were thought to cover the entire length of the segments uniformly like 'beads on a string'  
66 [12-17]. Using HITS-CLIP (high throughput sequencing of RNA isolated by crosslinking and  
67 immunoprecipitation), we have previously demonstrated that NP binding to vRNA in virions is not  
68 regular but enriched at some regions of the segments while depleted at others, providing evidence  
69 for an alternative model of non-uniform NP association to vRNA [18]. The advantage of HITS-  
70 CLIP is that, unlike other versions of the CLIP methodology, such as iCLIP or eCLIP [19], it  
71 uncovers the entire footprint of vRNA protected by NP rather than focusing on the NP-crosslinked  
72 sites on vRNA. Another study utilizing PAR-CLIP (photoactivatable ribonucleoside-enhanced  
73 crosslinking and immunoprecipitation) [20], a technically related version of HITS-CLIP that can  
74 also identify NP binding sites with nucleotide resolution, reached the same conclusion that NP  
75 binding is not pervasive throughout the segments inside infected host cells [21].

76 We have further shown that the NP binding profiles of strains with a high degree of  
77 nucleotide sequence conservation can differ markedly [18]. The A/WSN/1933 (WSN) and

78 A/California/07/2009 (H1N1pdm) strains, both of the H1N1 subtype with an overall sequence  
79 homology of 85%, contain NP binding sites that are shared between both strains as well as unique  
80 to each strain. Previous *in vitro* binding assays indicated that NP binds RNA in a sequence-  
81 independent manner [22, 23], raising the question of how strain-specific NP binding to vRNA is  
82 accomplished. We did observe a statistically robust bias for NP binding sites in that they are  
83 relatively depleted in uracils and enriched for guanines compared to genome-wide nucleotide  
84 content [18]. However, given the vast spread in nucleotide content among all NP peaks in the  
85 viral genome, this bias is unlikely to be the sole underlying determining factor of NP recruitment.  
86 Moreover, despite the lack of nucleotide selectivity of NP *in vitro*, it cannot be ruled out that  
87 accessory proteins *in vivo* ensure specific nucleotide sequences to be recognized and bound by  
88 NP. An alternative possibility is that three-dimensional organization of the IAV genome guides NP  
89 interaction with vRNA, which would be somewhat comparable to higher-order chromatin structure  
90 of eukaryotic DNA genomes contributing to nucleosome packaging [24, 25].

91 In this study, we examined how NP association impacts virus replication by introducing  
92 local mutations to alter the NP binding profile. We unexpectedly observed that local changes in  
93 nucleotide sequence can produce global changes in NP binding in a nucleotide sequence-  
94 independent manner. Moreover, we observed that alterations in NP binding profiles can affect  
95 virus replication kinetics by adversely affecting segment packaging efficiency and increasing the  
96 proportion of semi-infectious particles. Taken together, our data indicate an essential contribution  
97 of NP binding to vRNA for productive virus assembly.

## 98 **Results**

### 99 ***Introducing a segment with a divergent NP binding profile reduces replication fitness***

100 Comparative analysis between the genome-wide NP binding profiles determined by NP  
101 HITS-CLIP of the H1N1pdm and WSN strains indicated a varying degree of similarity among  
102 segments [18]. For example, the NA segments of both strains show a high Pearson correlation in  
103 terms of NP binding (**Figure 1A**), while the NS segments display the lowest Pearson correlation  
104 coefficient of all segments (**Figure 1B**). This variability does not reflect nucleotide conservation,  
105 as the NA and NS segments are 81% and 85% conserved, respectively. We sought to determine  
106 the relationship between NP-vRNA binding and virus replication by exchanging either the NA or  
107 NS segment of the H1N1pdm strain with the equivalent segment of the WSN strain to generate  
108 two chimeric mutant strains using reverse genetics. Infection of these strains was performed at a  
109 MOI of 0.01 and the dynamics of virus production was measured by TCID<sub>50</sub> assays at the  
110 indicated time points. Multi-cycle infection experiments showed no significant difference in  
111 replication between the mutant virus containing the WSN NA segment within the H1N1pdm  
112 background (pdm [WSN NA]) and the wildtype H1N1pdm strain, suggesting that segments with  
113 similar NP-vRNA binding profiles can efficiently complement virus replication (**Figure 1C**). In  
114 contrast, viral titers of the mutant strain containing the WSN NS segment (pdm [WSN NS]), which  
115 differs greatly in the overall NP binding profile, were significantly lower than wildtype at 16, 24,  
116 and 48 hours post infection (hpi) (**Figure 1C**). This observation suggests that introducing a  
117 segment with a more divergent NP-vRNA binding profile can deleteriously affect virus replication.

118

### 119 ***vRNA sequence influences NP binding***

120 To further examine the relationship between NP-vRNA binding and virus replication, we  
121 sought to alter the NP-vRNA binding profile of a single segment within its own viral background  
122 and assess the impact on viral lifecycle. The 5' regions of the NS segments display the most  
123 divergent NP binding profiles between the WSN and H1N1pdm strains, even though their

124 nucleotide sequence varies only in 32 out of 220 nucleotides (85% conservation) (**Figure 2A**).  
125 This region in the WSN NS gene segment exhibits robust NP binding, while the corresponding  
126 region in H1N1pdm is depleted for NP association (**Figure 2B**, red boxes). Therefore, we  
127 introduced sub-segmental swapping mutations and generated chimeric NS segments by placing  
128 the NP-bound sequence of WSN (nucleotides 50 to 251) into the H1N1pdm background (referred  
129 to as strain pdm [WSN-NS 5']). A reciprocal mutant virus that contains the NP-free region of  
130 H1N1pdm in the WSN NS segment (referred to as strain WSN [pdm-NS 5']) was also generated  
131 (**Figure 2B**). These ~200 nucleotides of the 5' NS vRNA account for the C-terminal regions of the  
132 NS1 and NS2 proteins, which are 80% and 90% conserved, respectively, between both strains.  
133 These NS mutant strains were rescued and amplified for subsequent HITS-CLIP analyses to  
134 identify their NP binding profiles. Introducing the WSN sequence into the H1N1pdm background  
135 resulted in the formation of ectopic NP binding sites, as observed in the WSN strain (**Figure 2C**,  
136 top panel). This observation demonstrates that the NP binding profile of a given segment is not  
137 static but indeed amenable to nucleotide alterations. Similarly, introduction of the H1N1pdm 5' NS  
138 region into the corresponding locus in the WSN NS segment resulted in loss of these NP peaks,  
139 which is reminiscent of the NP binding profile of the H1N1pdm strain (**Figure 2C**, bottom panel).  
140 Taken together, our results indicate that vRNA sequence can direct NP binding.

141

### 142 ***Local nucleotide changes in vRNA impact NP binding in other segments***

143 Unexpectedly, genome-wide examination of the NP binding profiles of the two NS chimeric  
144 mutants revealed that the 5' region of the NS segment was not the only site that showed a  
145 transformed NP binding profile (**Figure 3**). To compare NP peak locations between strains in an  
146 unbiased manner, a peak-finding algorithm was used to call specific peaks on each segment and  
147 overlap with the peaks of another strain. Our analysis revealed that the majority of NP peaks  
148 prevailed in the parental and chimeric mutant strains, yet a number of peaks were detected that  
149 are present only in either strain (see **Tables 1+2** for coordinates of all called peaks). In particular,

150 the novel peaks in the NS segment of the chimeric mutant pdm [WSN-NS 5'] strain were  
151 noticeably accompanied by loss of NP peaks in the PB2, HA, and M segments, while ectopic  
152 peaks emerged in the PB1, PA, and M segments (**Figure 3A**, arrowheads). A similar observation  
153 was made when comparing the WSN [pdm-NS 5'] chimeric mutant to its parental WSN strain  
154 (**Figure 3B**, arrowheads). Remarkably, all of these alterations in NP-vRNA association occurred  
155 in the absence of vRNA nucleotide changes at the respective loci and despite the fact that the  
156 primary nucleotide sequence for each of these segments of the chimeric mutants is identical to  
157 the parental strains. We verified by re-examining the deep sequencing reads of our HITS-CLIP  
158 data that secondary mutations, which may have accumulated during the propagation of the  
159 chimeric strains, were indeed absent at the affected loci. Taken together, our findings clearly  
160 demonstrate that primary nucleotide sequence *per se* cannot solely account for NP deposition on  
161 vRNA. Moreover, this observation is in line with previous *in vitro* studies that indicated that NP  
162 binds RNA in a sequence-independent manner [22, 23] and suggests that NP binding specificity  
163 is governed by an additional layer of regulation beyond primary nucleotide sequence.

164

165 ***Alterations in NP-vRNA binding can affect virus replication by modulating segment***  
166 ***packaging efficiency and semi-infectious particle production***

167 To study the impact of NP-vRNA binding changes on the viral lifecycle in the NS 5' sub-  
168 segmental mutants, we next compared the multi-cycle growth kinetics of the chimeric mutant  
169 viruses to their parental strains. The pdm [WSN-NS 5'] mutant displayed a comparable replication  
170 rate to the parental H1N1pdm strain (**Figure 4A**), while the WSN [pdm-NS 5'] mutant grew to  
171 significantly lower titers at 16, 24, and 48 hpi (**Figure 4B**). We reasoned that a decrease in viral  
172 replication should also be reflected in segment packaging efficiency into virions. To this end, we  
173 conducted competitive plasmid transfection assays between wildtype and chimeric NS segments  
174 [26], and generated influenza viruses by transfecting the reverse genetics plasmids containing  
175 segments 1-7 together with two distinct NS segments that would compete for incorporation into



176 virions (**Figure 4C**). We performed the competitions for both H1N1pdm and WSN backgrounds  
177 by harvesting the rescued viruses and amplifying by RT-PCR a region within the NS segment that  
178 spans the swapped locus to distinguish the origin of the NS segment packaged in the progeny  
179 virions. The PCR amplicons were then converted into an Illumina-compatible library and deep  
180 sequenced to determine the ratio of the incorporated NS segments. In the H1N1pdm background,  
181 we competed the wildtype with the chimeric pdm [WSN-NS 5'] segment and observed that the  
182 latter did not package less preferentially into progeny virions (40.5% vs. 59.5%; **Figure 4D**). This  
183 absence of preference for the wildtype segment may explain why no virus replication defect was  
184 observed for the chimeric NS segment. Conversely, competition between the wildtype and  
185 chimeric WSN [pdm-NS 5'] segments within the WSN background revealed a significant  
186 preference for the wildtype NS segment, as 81.7% of the wildtype segment was found in progeny  
187 virions as opposed to 18.3% of the chimeric segment (**Figure 4D**), which provides an explanation  
188 for the observed growth defect of the WSN [pdm-NS 5'] mutant strain. Taken together, these data  
189 suggest that binding of NP at the 5' end of WSN NS vRNA is important for its efficient packaging.

190 To further examine a potential packaging defect for the chimeric WSN [pdm-NS 5'] mutant,  
191 we performed multi-color fluorescence *in situ* hybridization (FISH) to assess segment  
192 colocalization during viral infection. We focused on the colocalization of the NS with the M  
193 segment, as our previous studies have shown that the intracellular distribution of the M segment  
194 is highly correlated with the distribution of the NS segment, and that these two segments cluster  
195 together in putative vRNA segment assembly network constructions with machine learning [27].  
196 Host cells infected with either wildtype or chimeric mutant virus for both WSN and H1N1pdm  
197 backgrounds were fixed and stained with probes at 8 hpi (**Figure 5A**). The total number of  
198 collocated spots within multiple cells was quantified using a previously developed image analysis  
199 pipeline [28]; at least five cells were imaged per virus strain on a confocal microscope with fine z-  
200 stack to produce a 3D image. A similar number of vRNA spots were identified in each cell, and  
201 the proportion of cytoplasmic M or NS foci alone or collocated with each other were measured. A

202 significant decrease in segment colocalization was observed in the WSN [pdm-NS 5'] strain  
203 compared to wildtype WSN (**Figure 5B**). Consistently, a higher proportion of cytoplasmic foci  
204 contained either M or NS segments alone in the chimeric mutant. On the other hand, we did not  
205 detect a difference in segment colocalization between the M and NS segments for the chimeric  
206 pdm [WSN-NS 5'] strain (**Figure 5C**), which is in line with the fact that a similar growth rate was  
207 observed as for the wildtype virus. Thus, our results indicate that alterations in NP-vRNA  
208 association can result in segment colocalization defects during intracellular virus assembly.

209         Previous studies have demonstrated that the production of semi-infectious particles during  
210 influenza infection may be a result of inefficient packaging. To determine whether the observed  
211 defect in packaging led to an increase in semi-infectious particle development, we compared the  
212 total number of particles, quantified by the HA titers, and infectious particles, quantified by plaque  
213 titers, of WSN [pdm-NS 5'] to its parental strain. HA titers of WSN [pdm-NS 5'] were comparable  
214 to wildtype, whereas PFU per mL of the chimeric virus was reduced 2 to 10-fold (depending on  
215 the replicate) (**Figure 6A**). Additionally, we performed qPCR analysis for all eight segments on  
216 vRNA extracted from wildtype and mutant WSN [pdm-NS 5'] virions normalized to PFU per mL.  
217 The Ct values for the chimeric WSN [pdm-NS 5'] mutant were lower than for the wildtype strain,  
218 indicating an overall higher absolute quantity of vRNA in the mutant while the relative abundance  
219 between the eight segments within each strain was similar (**Figure 6B**). These data indicate that,  
220 in virus preparations with similar infectivity, the WSN [pdm-NS 5'] mutant produced more semi-  
221 infectious particles. This conclusion was confirmed by an increase in protein levels of HA, NP,  
222 and M1 in the WSN [pdm-NS 5'] strain as compared to wildtype in sample preparations of similar  
223 infectious titer (**Figure 6C**). Taken together, these results suggest that the growth defect of the  
224 WSN [pdm-NS 5'] mutant is due to a packaging defect, which results in more semi-infectious  
225 particles.

226

## 227 Discussion

228 We have recently shown that NP binding to vRNA is not pervasive, but restricted to specific  
229 regions of the viral genome. One major question that arose from this observation was whether  
230 faithful formation of the strain-specific NP binding profile would impact virus replication. We  
231 performed sub-segmental mutational analyses and observed that exchanging nucleotide  
232 sequences can alter the NP binding profile (**Figure 2**). Unexpectedly, while NP peaks either  
233 ectopically appeared or were ablated at the mutation site, the most striking observation of this  
234 study was that alterations in NP binding were not limited to the mutated regions. Instead, NP  
235 binding was affected genome-wide on other segments as well despite the fact that their nucleotide  
236 sequences remained identical to the wildtype strain (**Figure 3**). We refer to this phenomenon as  
237 the ‘butterfly effect of NP packaging’, as minute local changes can produce genome-wide effects  
238 (**Tables 1+2**). Finally, we demonstrate that mutant strains, which display a modified NP binding  
239 profile and reduced replication fitness, have a defect in segment packaging efficiency and an  
240 increase in the formation of semi-infectious particles (**Figures 4-6**).

241 A revised influenza virus genome architecture has recently been proposed, which  
242 suggests that NP binds vRNA in a non-uniform and non-random manner [18, 21], but how this  
243 apparent NP specificity is achieved remained unanswered. It was thus unclear whether nucleotide  
244 changes in vRNA would alter the NP binding profile, or whether the NP binding profile would  
245 remain static due to an as-yet unidentified mechanism that would maintain NP binding at the  
246 original positions in the vRNA. While we indeed observed changes in NP binding caused by  
247 changes to the underlying nucleotide sequences, we also observed that identical nucleotide  
248 sequences can have distinct context-dependent outcomes in terms of NP association. This  
249 observation is in line with previous *in vitro* studies that demonstrated that NP interacts with RNA  
250 in a sequence-independent manner [22, 23]. Furthermore, this finding suggests that NP binding  
251 is not governed by the underlying vRNA sequence alone, but subject to a more complex layer of  
252 regulation. To explain the global effect on NP binding caused by local changes, we propose that

253 higher order genome organization may dictate NP binding and speculate that intersegmental  
254 interactions may contribute to shaping the genome-wide NP binding profile.

255         Interestingly, we observed strain-specific differences in the impact of NP binding on  
256 replication fitness, where alteration of the WSN NS segment resulted in a virus with decreased  
257 replication and packaging efficiency, while H1N1pdm did not. These results are particularly  
258 surprising, since the 5' region of H1N1pdm had low NP binding, which we previously proposed  
259 would coordinate vRNA-vRNA interactions. Therefore, we would have expected that the formation  
260 of NP peaks at this site would disrupt these RNA interactions and impact replication and  
261 packaging of this virus. In contrast, it was the NP peak-containing 5' region of WSN NS whose  
262 ablation disrupted packaging efficiency and viral replication. While counter to our initial  
263 hypothesis, these data may provide a more nuanced view of how NP binding may coordinate  
264 inter-segmental interactions. In addition, NP-vRNA binding, as examined here, is only a single  
265 aspect of the complex coordinative effort that regulates viral replication and packaging. Overall,  
266 strain-distinct characteristics may provide the H1N1pdm strain with more flexibility in packaging,  
267 so that the pdm [WSN-NS 5'] chimeric virus could gain NP peaks and yet replicate as efficiently  
268 as the wildtype H1N1pdm strain. In support for the role of strain background in packaging  
269 plasticity, an increased number of alterations were found in the NP-vRNA binding profile for the  
270 pdm [WSN-NS 5'] mutant as compared to the WSN chimeric mutant (**Tables 1+2**), which could  
271 indicate that the H1N1pdm background is more amenable to modulations of its NP binding profile.  
272 Future studies examining the relationship between NP binding profile and intersegmental  
273 interactions, using recently developed technologies to study *in vivo* RNA-RNA interactions  
274 employing high-throughput sequencing [29], will help elucidate how genome organization affects  
275 virus replication.

276 **Materials and Methods**

277

278 **Generating mutant virus strains and measuring viral growth curves**

279 Madin-Darby canine kidney (MDCK) cells were maintained in Minimum Essential Medium  
280 Eagle (Sigma-Aldrich) supplemented with 10 % fetal bovine serum (FBS, Hyclone), 2 mM L-  
281 glutamine (Gibco) and 1 % penicillin/streptomycin (Gibco). HEK293T cells were cultured in DMEM  
282 containing 10% FBS, 2 mM L-glutamine and 1 % penicillin/streptomycin. Rescue of recombinant  
283 A/WSN/1933 (H1N1) and A/California/07/2009 (H1N1) strains were previously described [3, 30].  
284 Mutations in segments were performed by either conventional site-directed mutagenesis or  
285 chemical gene synthesis followed by subcloning of mutant constructs into rescue vectors. In brief,  
286 HEK293T cells were transfected with of each of the eight bidirectional plasmids containing each  
287 of the wildtype or mutant segments from either A/WSN/1933 (obtained from Richard Webby, St.  
288 Jude Children's Research Hospital) or A/California/07/2009 (obtained from Jesse Bloom, Fred  
289 Hutchinson Cancer Research Center) using TransIT-Express (Mirus) according to the  
290 manufacturer's instruction. The HEK293T supernatant was harvested and used to inoculate  
291 MDCK cells. The MDCK cell supernatants containing recombinant virus were collected (CP1) and  
292 used to generate a virus stock (CP2). Virus propagation for HITS-CLIP was generated from the  
293 same CP1 stock.

294 Multicycle growth curves were performed by infecting with a multiplicity of infection (MOI)  
295 of 0.01. Confluent MDCK cells were inoculated in triplicate with each virus and incubated for 1 h  
296 at room temperature with shaking, after which the inoculum was replaced with 500  $\mu$ l of serum-  
297 free medium with 1 mg/mL TPCK-treated trypsin (Worthington Biochemical Corporation).  
298 Samples were titered by tissue culture infectious dose 50 (TCID<sub>50</sub>) [31] or by standard plaque  
299 assay in MDCK cells. All growth curve measurements were performed in at least two independent  
300 biological replicates.

301

## 302 **HITS-CLIP and deep sequencing data analysis**

303 HITS-CLIP experiments were performed as described [18, 32]. In brief, virions in clarified  
304 culture medium were irradiated with UV light at 254 nm (400 mJ/cm<sup>2</sup> and 200 mJ/cm<sup>2</sup>), followed  
305 by ultracentrifugation over a 30% sucrose cushion. Virus particles concentrated from 25 mL of  
306 culture supernatant were resuspended in 300 µl PXL buffer (1x PBS, 1% NP40, 0.5%  
307 deoxycholate, 0.1% SDS), followed by DNase and partial RNase treatment. Immunoprecipitation  
308 was performed with anti-NP antibody (mouse monoclonal antibody MAB8251 from Millipore).  
309 Subsequent ligation of 5' and 3' adapters, RT reaction and first-round PCR amplification step were  
310 carried out as described [32]. The first-round PCR products were converted into an Illumina-  
311 compatible deep sequencing library using the NEBNext Ultra DNA Library Prep Kit (NEB), and  
312 deep sequencing was carried out using Illumina's NextSeq platform. Data analysis was performed  
313 as described [32] using the NovoAlign alignment program and mapping the reads to reference  
314 genomes available from the NCBI database. NP peaks were called using the tag2peak.pl script  
315 of CLIP Tool Kit [33] with the options "-ss --valley-seeking --valley-depth 0.5 and -minPH" to take  
316 into account a minimum threshold based on deep sequencing coverage of the sample (i.e. the  
317 total number of mapped nucleotides/length of the genome). NP binding profiles of WSN and  
318 H1N1pdm strains were taken from our previous publication [18]. Deep sequencing data generated  
319 in this study were deposited in the Sequence Read Archive under accession no. SRP151136. At  
320 least two biological replicates of HITS-CLIP were performed for each strain, and the NP binding  
321 profiles of all replicates were highly correlative with Pearson correlation coefficients ranging from  
322 0.71 to 0.86. The reproducibility of our HITS-CLIP assay on Influenza virus strains has been  
323 described previously [18].

324

## 325 **Segment packaging competition assay (nine-plasmid competitive transfections)**

326 Plasmids encoding PB2, PB1, PA, HA, NP, NA, and M of the WSN strain were transfected  
327 with two distinct plasmids encoding NS as indicated. One µg of each plasmid was mixed with

328 TransIT transfection reagent in Opti-MEM medium and transfected into HEK293T cells; 6 h post-  
329 transfection the media was replaced with fresh Opti-MEM medium. Virus supernatants were  
330 collected at 24 h and 48 h post-transfection and pooled, followed by virus concentration by  
331 ultracentrifugation on a 30% sucrose cushion. RNA from virus pellet was isolated using phenol-  
332 chloroform extraction. Samples were treated with ezDNAse (ThermoFisher), and SuperScript IV  
333 One-Step RT-PCR was performed using a primer pair (5'-GTTGTAAGGCTTGCATAAATG-3' and  
334 5'-TACAGAGATTCGCTTGGAGA-3') that anneals to conserved sequences in both NS variants  
335 to amplify in an unbiased manner a 193-bp region of the packaged NS segments encompassing  
336 the variant region. The amplicons were then converted into an Illumina-compatible library using  
337 NEBNext Ultra II DNA Library Prep Kit (NEB) followed by deep sequencing to determine the  
338 incorporation ratio of the two NS variants in progeny viruses.  $3.0 - 7.1 \times 10^5$  sequence reads were  
339 analyzed for each experiment.

340

#### 341 **Fluorescence *in situ* hybridization of influenza NS and M segments**

342 FISH was performed on infected cells as previously described [3, 28] using probes against  
343 M and NS vRNA segments conjugated to Alexa Fluor 488 and Quasar 570, respectively  
344 (Biosearch Technologies). Alexa Fluor 488-phalloidin (Life Technologies) was used to mark the  
345 plasma membrane. An Olympus FluoView FV1000 confocal microscope with a 60x oil immersion  
346 objective was used to acquire stacks of each cell with z intervals of 0.17  $\mu\text{m}$ . Voxel spacing was  
347 approximately 50 x 50 x 170 nm to ensure high resolution images for subsequent analysis. All  
348 imaging experiments were performed at least twice and a minimum of five representative cells  
349 were analyzed.

350 3D confocal stacks of FISH were background subtracted and deconvolved with Huygens  
351 Professional (version 16.05; Scientific Volume Imaging B.V.) at 40 iterations per deconvolution  
352 assuming a signal-to-noise ratio of 20. The images were then analyzed using Imaris software  
353 (version 8.4.1; Bitplane AG). DAPI marks the cell nucleus, and the signal was used to create a

354 surface and mask the vRNA signal from the nucleus. The 'Spots' feature was used to assign a  
355 spot for each FISH probe above 2x the mean fluorescence intensity standard deviation provided  
356 by Imaris for each channel to provide an unbiased approach. Cell contours were defined manually  
357 using the phalloidin staining. Colocalization of M and NS spots were defined using an Imaris  
358 Xtension program called "Colocalization of Spots" within 300 nm (the size of our diffraction limit  
359 pixel size). The Imaris Cell feature allowed for integration of the cell contour, nuclear surface, and  
360 cytoplasmic colocalized and non-colocated spots. This step ensured that only the signal from a  
361 given cell was analyzed for colocalization. The statistics were exported and analyzed in PRISM  
362 for each cell.

363

#### 364 **Hemagglutination assay**

365 A V-bottom 96-well microtiter plate was used to make 2-fold serial dilutions of virus in PBS.  
366 An equal volume of 0.5% turkey red blood cells (RBC) was added and incubated for 30 minutes  
367 at room temperature. Settling of the RBC to form a button at the bottom of the well was recorded  
368 as negative, whereas hemagglutination (RBC staying in suspension) was assigned a positive  
369 result. The highest dilution of virus that caused complete hemagglutination was considered as the  
370 end-point in HA titration.

371

#### 372 **Western blot analysis on virions**

373 Equivalent plaque forming units (PFU) were concentrated by ultracentrifugation on a 30%  
374 sucrose cushion. Virus particles were then resuspended in the same volume of NP40 lysis buffer  
375 (50 mM Tris pH 7.4, 150 mM NaCl, 0.5 mM EDTA, 0.5% NP40) for Western blot analysis.  
376 Membranes were probed with primary antibodies mouse anti-NP (Millipore; MAB8251), mouse  
377 anti-Matrix Protein (Kerafast, Inc.; EMS009) or goat anti-Influenza A Virus (Abcam; ab20841) at  
378 a dilution of 1:1000. The appropriate HRP-conjugated secondary antibodies (Jackson



379 Laboratories) were used at a dilution of 1:4000. For quantitation, the pixel intensity of each band  
380 was determined using the ImageJ software (NIH) and then normalized to the indicated control.

381

### 382 **Relative quantification of viral RNA segments per PFU**

383 vRNA was extracted from virus supernatant containing the same amount of PFU using  
384 PureLink Viral RNA/DNA Mini Kit (Invitrogen). vRNA was reverse transcribed with Uni12/13  
385 specific primers using Superscript IV First-Strand Synthesis System (Invitrogen) as per  
386 manufacturer's instructions. The synthesized cDNA was mixed with specific primers for each  
387 segment in SYBR Green PCR Master Mix (Applied Biosystems) and the reaction performed on a  
388 7900HT Fast Real-Time PCR System (Applied Biosystems).

389 **Acknowledgements**

390           S.S.L. and N.L. are supported by the Charles E. Kaufman Foundation. D.J.S and V.S.C  
391 are supported by the National Institute of Health [grant number U01AI124303]. We thank  
392 Elizabeth McGrady and other members of the Lakdawala lab for technical support and helpful  
393 discussions. S.S.L. and N.L. are named inventors on a patent application describing the use of  
394 antisense oligonucleotides against specific NP binding sites as therapeutics.

395 Figure 1

396

397

398

399

400

401

402

403 **Figure 1. Swapping segments with similar NP binding profiles preserves replication**

404 **fitness.** (A+B) The NP binding profiles for the NA and NS segments are shown for

405 A/California/07/2009 (H1N1pdm) and A/WSN/1933 (WSN) strains. Abundance of CLIP reads (y-

406 axis) was normalized against the highest peak in each individual vRNA segment and arbitrarily

407 set to 100. Sequencing tracks and Pearson correlation coefficients (r) between WSN and

408 H1N1pdm segment pairs are taken from Lee et al. [18]. (C) Replication kinetics of the wildtype

409 and two H1N1pdm mutant strains, for which either the NA or NS segment has been exchanged

410 with the WSN equivalent. MDCK cells were infected at a MOI of 0.01, and supernatants were

411 collected at indicated time points to determine virus titers using TCID<sub>50</sub> assays. Graphs are

412 representative of three independent experiments. Two-way ANOVA analysis was used to

413 determine statistically significant differences (marked by asterisk).

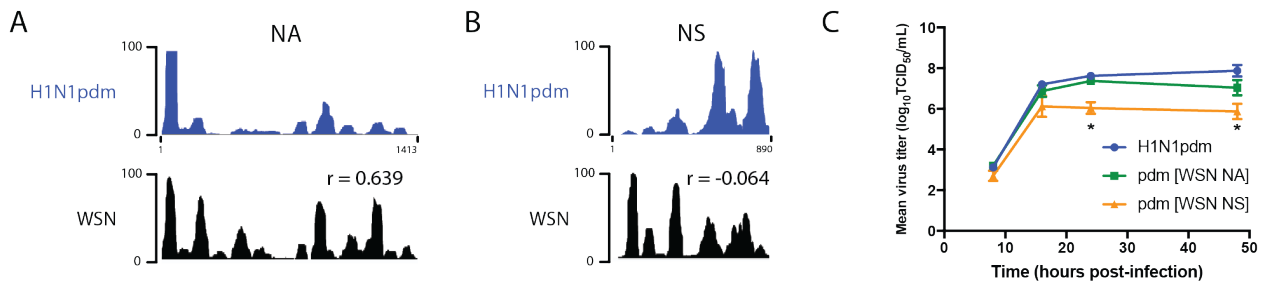

414 Figure 2

415

416 A

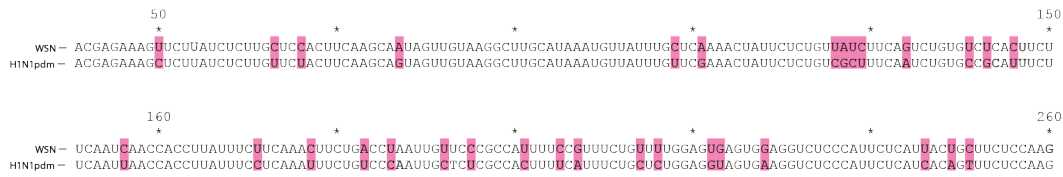

418

419

420

B

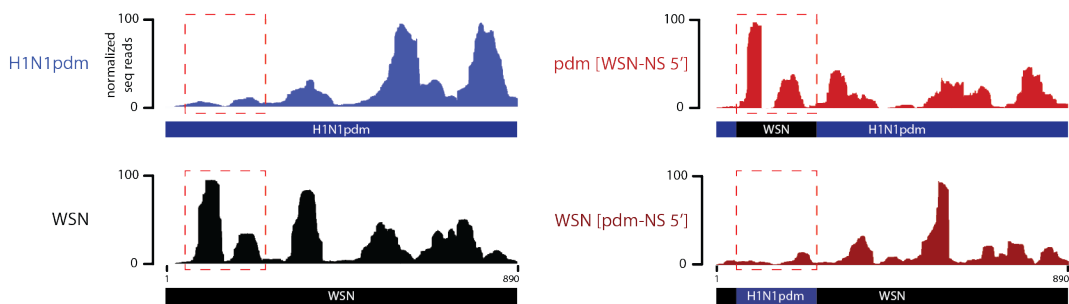

421

422

423

424

425

426

427 **Figure 2. Genomic vRNA mutations can cause alterations in NP binding.** (A) Sequence

428 alignment of the NS segment 5' region of the WSN and H1N1pdm strains (red dashed boxes

429 shown in B). Nucleotide differences between the strains are highlighted in pink. Numbers indicate

430 the nucleotide position in the vRNA segment. (B) The boxed region of the WSN strain, which

431 contains NP peaks, was swapped with the corresponding NP-free sequence of H1N1pdm,

432 resulting in two chimeric NS segment mutant strains (referred to as pdm [WSN-NS 5'] and WSN

433 [pdm-NS 5']). NP binding profiles of the NS segments are shown for WSN, H1N1pdm, and the

434 two chimeric strains.

435 Figure 3

436 A

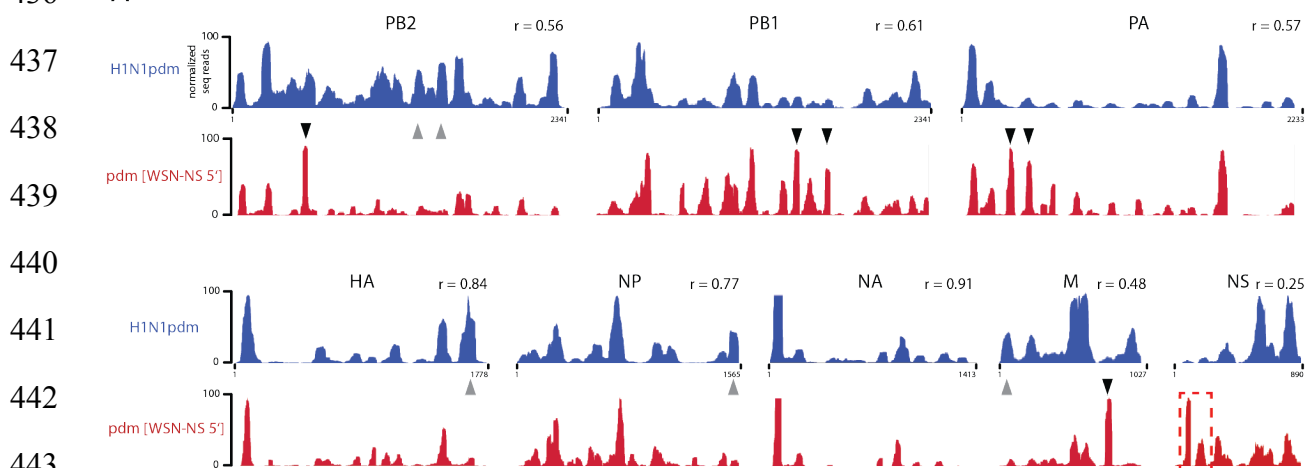

444 B

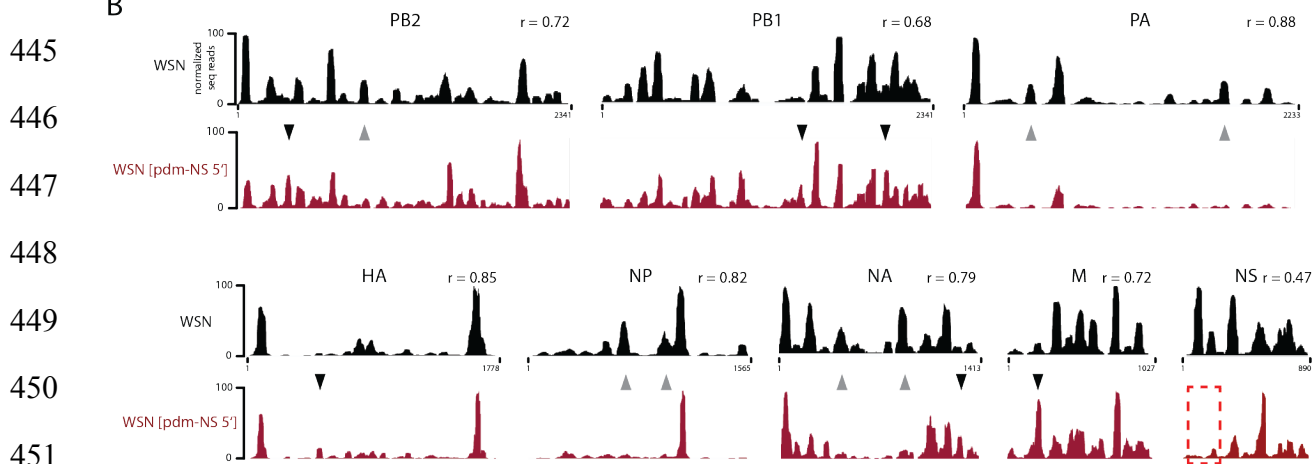

452 **Figure 3. Genome-wide NP binding profile is affected by local mutations independent of**  
453 **underlying vRNA sequence. (A+B)** Comparison of NP binding profiles determined by HITS-  
454 CLIP between wildtype and chimeric mutant H1N1pdm (A) and WSN strains (B). Arrowheads  
455 indicate exemplary regions of NP peaks that are noticeably different between wildtype and the  
456 chimeric mutant viruses. Tables 1 and 2 list the coordinates of all shared and unique regions.  
457 Pearson correlation coefficients ( $r$ ) between wildtype and chimeric segment pairs are indicated.  
458 Red dashed boxes denote the mutated regions. Representative tracks of all eight IAV segments  
459 are shown. Note that biological replicates are highly reproducible in their genome-wide NP binding  
460 profiles, with Pearson correlation coefficients of  $>0.7$ .

461 Figure 4

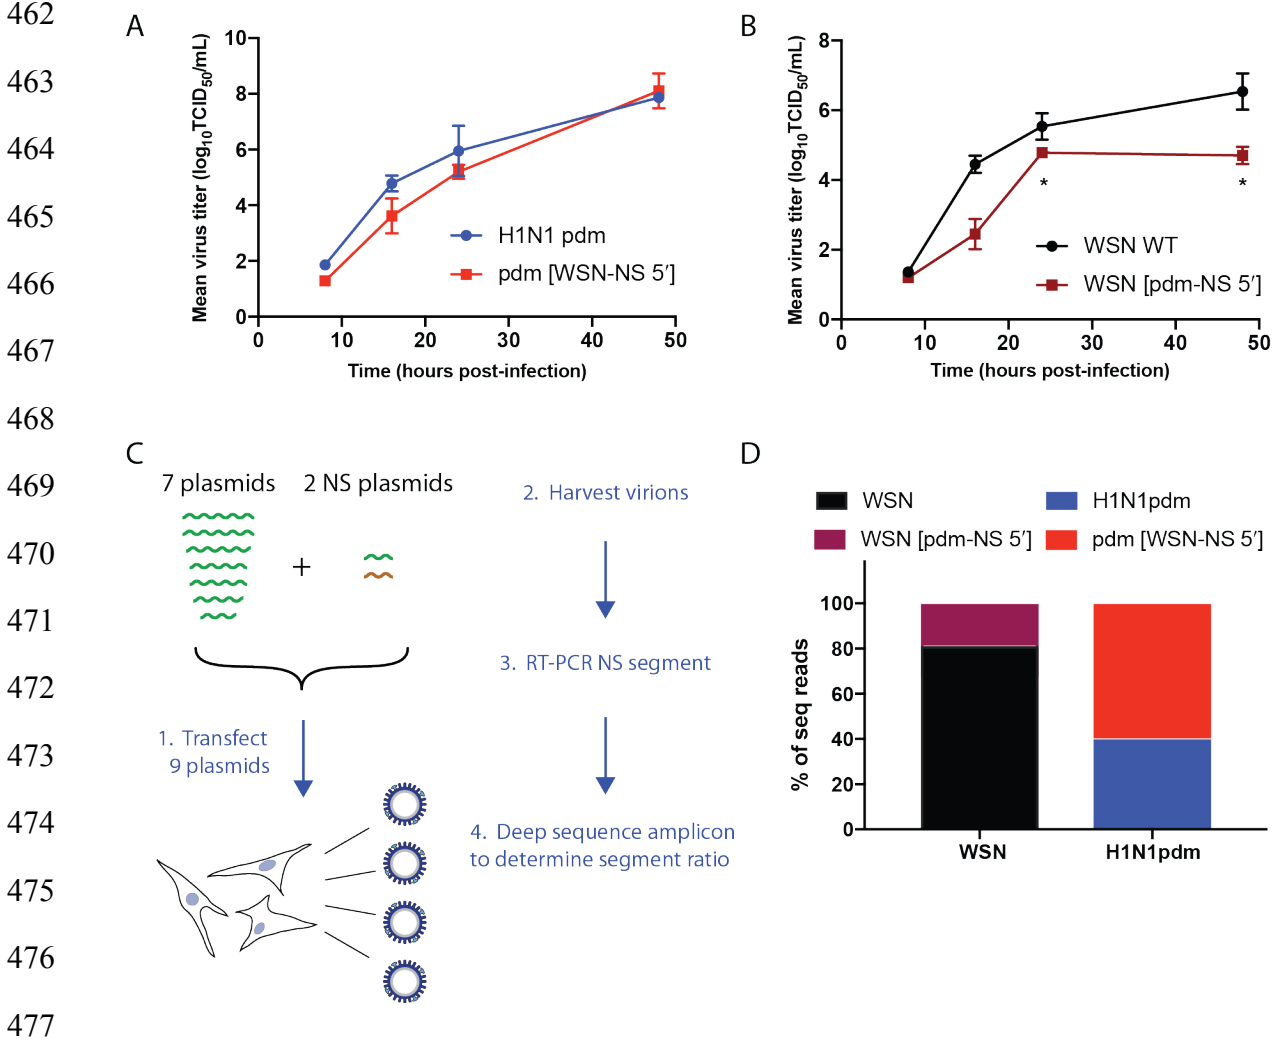

478 **Figure 4. Viral replication and packaging preference of NS chimeric mutants. (A+B)**

479 Replication kinetics of wildtype and chimeric mutants of H1N1pdm (A) and WSN strains (B).

480 MDCK cells were infected in triplicate at a MOI of 0.01. Supernatants were collected at the

481 indicated time points and virus titers were determined using TCID<sub>50</sub> assays. Two-way ANOVA

482 analysis was used to determine statistically significant differences (marked by asterisks). (C)

483 Schematic of segment packaging competition assay. Seven plasmids containing either H1N1pdm

484 or WSN segments 1-7 were co-transfected with two distinct NS plasmids as indicated to reverse

485 engineer viruses; the two NS segments compete for packaging into virions. Upon harvesting

486 progeny viruses, vRNA was isolated and subjected to RT-PCR of the NS segment. A primer pair

487 annealing to conserved sequences in both NS variants was used to generate an amplicon, which  
488 encompasses the mutated region. Following library preparation, the amplicon was deep  
489 sequenced to determine the incorporation ratio of the NS variants into virions. **(D)** Percentage of  
490 deep sequence reads of the NS variants incorporated into H1N1pdm or WSN virions after virus  
491 rescue. Values are the average of at least two independent biological replicates.

492 Figure 5

493

494

495

496

497

498

499

500

501

502

503

504

505

506

507

508

509

510

511

512

513

514

515

516

517

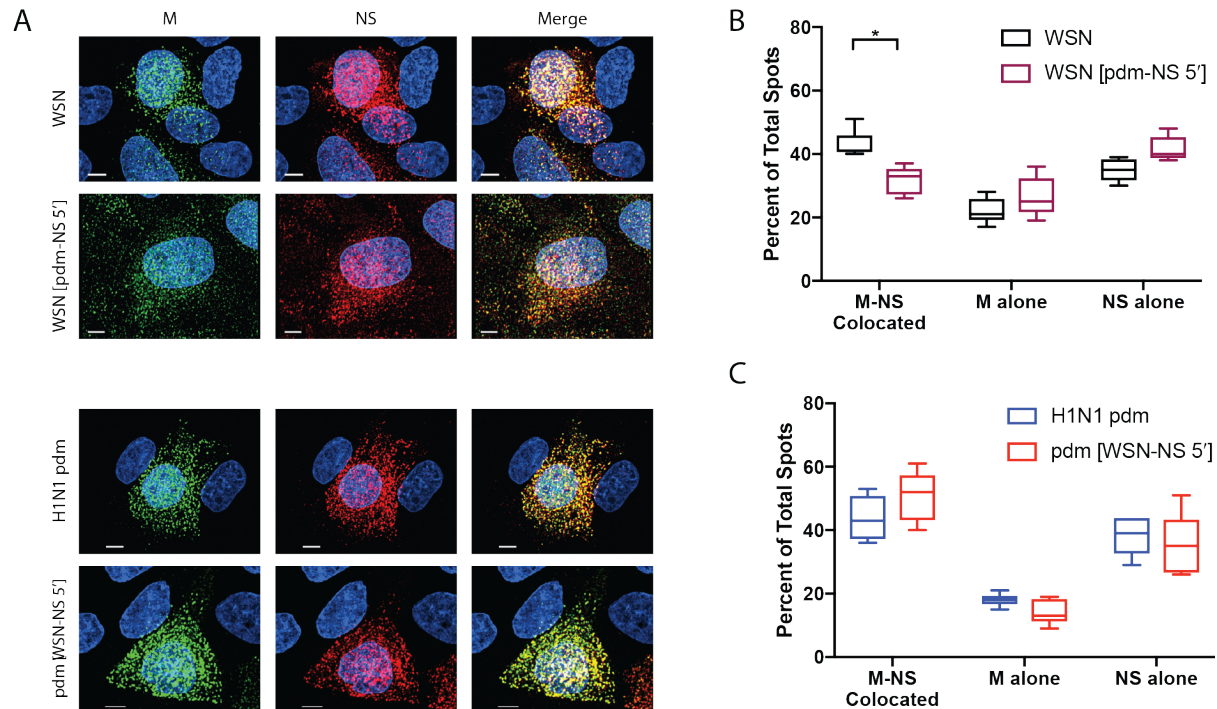

506 **Figure 5. The NS chimeric mutant of the WSN strain shows a segment colocalization defect.**

507 (A) Representative FISH images of M and NS segments from two independent experiments.

508 MDCK cells were infected with either wildtype or chimeric mutants at a MOI of 3 and then fixed 8

509 hpi. FISH probes targeting the M vRNA (Alexa 488, green) and NS vRNA (Quasar 570, red) were

510 used. Cell nuclei were stained with DAPI (blue). Scale bars are 5 μm. (B+C) Quantification of the

511 cytoplasmic colocalization of M and NS segments for the wildtype WSN and mutant WSN [pdm-

512 NS 5'] strains (B), and H1N1pdm and mutant pdm [WSN-NS 5'] strains (C). Fine confocal stacks

513 were acquired to reconstruct a 3D cell volume. Image analysis on deconvolved stacks included

514 generation of spots for each individual vRNA segment and quantification of colocalization of these

515 spots in the cytoplasm by using DAPI signal to mask the nuclear volume. Five cells were analyzed

516 for each condition. Two-way ANOVA analysis was used to determine statistically significant

517 differences (marked by asterisks).



518 Figure 6

519

520

521

522

523

524

525

526

527

528

529

530

531

532

533

534

535

536

537

538

539

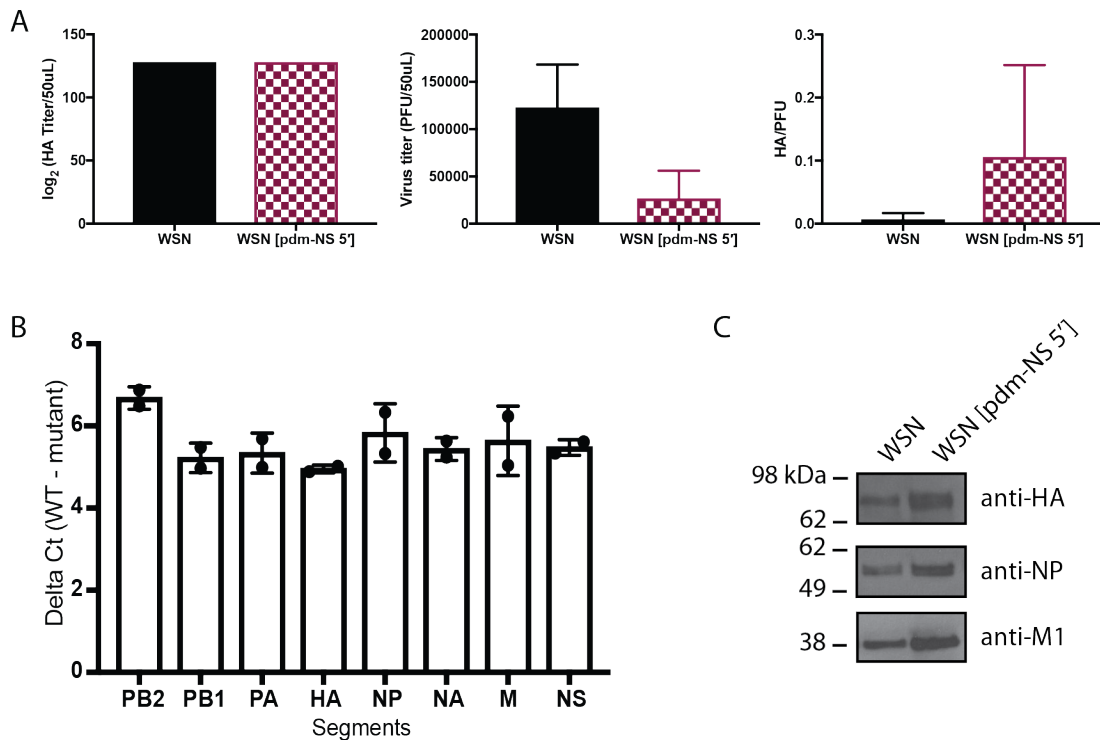

**Figure 6. Production of semi-infectious particles is increased in the WSN NS chimeric mutant.** (A) HA and PFU titers of WSN and NS chimeric virus strains. (B) Relative quantification of vRNA segments between wildtype and NS chimeric mutant strains by RT-qPCR. Values are the average of three independent experiments. RNA levels were normalized to PFU titers. (C) Supernatants from WSN or NS chimera-infected MDCK cells were collected at 48 hpi. Equal amounts of PFU were concentrated, lysed and the viral proteins separated by SDS-PAGE. Viral proteins were processed for Western blotting and probed for HA, NP and M1. Data shown is a representative of two independent experiments.

540 **Table 1.** Coordinates of common and unique NP peaks for the wildtype and chimeric NS mutant  
 541 H1N1 pdm strains (related to **Figure 3A**).

542

543

544

| Segment      | Both Strains                                                      | H1N1pdm                                                  | pdm [WSN-NS 5']                                                                   |
|--------------|-------------------------------------------------------------------|----------------------------------------------------------|-----------------------------------------------------------------------------------|
| <b>PB2</b>   | 36-86<br>204-268<br>496-581<br>974-1108<br>1608-1677<br>1986-2044 | 1282-1352<br>1435-1502<br>2221-2285                      |                                                                                   |
| <b>PB1</b>   | 902-998<br>1052-1118                                              | 94-161<br>276-337<br>1887-1947<br>2051-2110<br>2194-2263 | 383-442<br>590-620<br>745-810<br>1294-1344<br>1388-1430<br>1498-1551<br>1610-1647 |
| <b>PA</b>    | 48-100<br>151-215<br>415-472<br>1719-1779<br>2152-2220            | 1515-1575                                                | 302-342<br>521-565<br>604-665<br>775-871<br>981-1024<br>1164-1201                 |
| <b>HA</b>    | 80-140<br>848-910<br>1112-1159<br>1426-1493                       | 569-643<br>1597-1653                                     | 967-997<br>1047-1094                                                              |
| <b>NP</b>    | 245-338<br>536-594<br>655-713<br>948-1014                         | 1058-1115<br>1492-1547                                   | 105-153                                                                           |
| <b>NA</b>    | 25-80<br>189-243<br>737-799<br>841-902<br>1011-1075<br>1153-1213  |                                                          |                                                                                   |
| <b>M</b>     | 489-549<br>582-642                                                | 32-103<br>199-269<br>906-963                             | 747-799                                                                           |
| <b>NS</b>    | 321-382<br>673-783                                                | 516-586                                                  | 84-142<br>176-234                                                                 |
| <b>Total</b> | <b><u>31</u></b>                                                  | <b><u>17</u></b>                                         | <b><u>19</u></b>                                                                  |

545 **Table 2.** Coordinates of common and unique NP peaks for the wildtype and chimeric NS mutant  
 546 WSN strains (related to **Figure 3B**).

547

548

549

| Segment      | Both Strains                                                                      | WSN                           | WSN [pdm-NS 5']                                             |
|--------------|-----------------------------------------------------------------------------------|-------------------------------|-------------------------------------------------------------|
| <b>PB2</b>   | 36-86<br>204-268<br>403-463<br>637-688<br>1435-1502<br>1608-1677<br>1986-2044     | 866-923                       | 328-368                                                     |
| <b>PB1</b>   | 383-442<br>648-705<br>745-810<br>1498-1551<br>1653-1713<br>1887-1947<br>2051-2110 | 276-337                       | 902-998<br>1396-1430<br>2008-2042<br>2145-2178<br>2194-2263 |
| <b>PA</b>    | 48-100<br>415-472<br>604-665<br>775-871<br>1719-1779<br>2014-2067                 | 1351-1409                     | 151-215<br>1515-1575<br>1883-1929                           |
| <b>HA</b>    | 80-140<br>848-910<br>1112-1159<br>1597-1653                                       |                               | 496-537<br>949-979                                          |
| <b>NP</b>    | 245-338<br>536-594<br>655-713<br>1058-1115                                        | 948-1014<br>1492-1547         |                                                             |
| <b>NA</b>    | 25-80<br>189-243<br>1011-1075<br>1153-1213                                        | 404-469<br>841-902            | 1252-1293                                                   |
| <b>M</b>     | 489-549<br>747-799                                                                | 326-385<br>582-642<br>906-963 | 199-269                                                     |
| <b>NS</b>    | 321-382<br>516-586<br>673-783                                                     | 84-142<br>176-234             |                                                             |
| <b>Total</b> | <b><u>37</u></b>                                                                  | <b><u>12</u></b>              | <b><u>13</u></b>                                            |

## 550 References

- 551 1. Hatada E, Hasegawa M, Mukaigawa J, Shimizu K, Fukuda R. Control of influenza virus  
552 gene expression: quantitative analysis of each viral RNA species in infected cells. *J Biochem.*  
553 1989;105(4):537-46. PubMed PMID: 2760014.
- 554 2. McGeoch D, Fellner P, Newton C. Influenza virus genome consists of eight distinct RNA  
555 species. *Proc Natl Acad Sci U S A.* 1976;73(9):3045-9. PubMed PMID: 1067600; PubMed  
556 Central PMCID: PMCPMC430922.
- 557 3. Lakdawala SS, Wu Y, Wawrzusin P, Kabat J, Broadbent AJ, Lamirande EW, et al.  
558 Influenza A virus assembly intermediates fuse in the cytoplasm. *PLoS Pathog.*  
559 2014;10(3):e1003971. doi: 10.1371/journal.ppat.1003971. PubMed PMID: 24603687; PubMed  
560 Central PMCID: PMCPMC3946384.
- 561 4. Chou YY, Heaton NS, Gao Q, Palese P, Singer RH, Lionnet T. Colocalization of different  
562 influenza viral RNA segments in the cytoplasm before viral budding as shown by single-  
563 molecule sensitivity FISH analysis. *PLoS Pathog.* 2013;9(5):e1003358. Epub 2013/05/15. doi:  
564 10.1371/journal.ppat.1003358. PubMed PMID: 23671419; PubMed Central PMCID:  
565 PMCPMC3649991.
- 566 5. Essere B, Yver M, Gavazzi C, Terrier O, Isel C, Fournier E, et al. Critical role of  
567 segment-specific packaging signals in genetic reassortment of influenza A viruses. *Proc Natl*  
568 *Acad Sci U S A.* 2013;110(40):E3840-8. doi: 10.1073/pnas.1308649110. PubMed PMID:  
569 24043788; PubMed Central PMCID: PMCPMC3791739.
- 570 6. Fournier E, Moules V, Essere B, Paillart JC, Sirbat JD, Cavalier A, et al. Interaction  
571 network linking the human H3N2 influenza A virus genomic RNA segments. *Vaccine.*  
572 2012;30(51):7359-67. doi: 10.1016/j.vaccine.2012.09.079. PubMed PMID: 23063835.
- 573 7. Fournier E, Moules V, Essere B, Paillart JC, Sirbat JD, Isel C, et al. A supramolecular  
574 assembly formed by influenza A virus genomic RNA segments. *Nucleic Acids Res.*  
575 2012;40(5):2197-209. doi: 10.1093/nar/gkr985. PubMed PMID: 22075989; PubMed Central  
576 PMCID: PMCPMC3300030.
- 577 8. Gavazzi C, Isel C, Fournier E, Moules V, Cavalier A, Thomas D, et al. An in vitro network  
578 of intermolecular interactions between viral RNA segments of an avian H5N2 influenza A virus:  
579 comparison with a human H3N2 virus. *Nucleic Acids Res.* 2013;41(2):1241-54. doi:  
580 10.1093/nar/gks1181. PubMed PMID: 23221636; PubMed Central PMCID: PMCPMC3553942.
- 581 9. Gavazzi C, Yver M, Isel C, Smyth RP, Rosa-Calatrava M, Lina B, et al. A functional  
582 sequence-specific interaction between influenza A virus genomic RNA segments. *Proc Natl*  
583 *Acad Sci U S A.* 2013;110(41):16604-9. doi: 10.1073/pnas.1314419110. PubMed PMID:  
584 24067651; PubMed Central PMCID: PMCPMC3799358.
- 585 10. Noda T, Sugita Y, Aoyama K, Hirase A, Kawakami E, Miyazawa A, et al. Three-  
586 dimensional analysis of ribonucleoprotein complexes in influenza A virus. *Nat Commun.*  
587 2012;3:639. doi: 10.1038/ncomms1647. PubMed PMID: 22273677; PubMed Central PMCID:  
588 PMCPMC3272569.
- 589 11. Gilbertson B, Zheng T, Gerber M, Printz-Schweigert A, Ong C, Marquet R, et al.  
590 Influenza NA and PB1 Gene Segments Interact during the Formation of Viral Progeny:  
591 Localization of the Binding Region within the PB1 Gene. *Viruses.* 2016;8(8). doi:  
592 10.3390/v8080238. PubMed PMID: 27556479; PubMed Central PMCID: PMCPMC4997600.
- 593 12. Einfeld AJ, Neumann G, Kawaoka Y. At the centre: influenza A virus ribonucleoproteins.  
594 *Nat Rev Microbiol.* 2015;13(1):28-41. doi: 10.1038/nrmicro3367. PubMed PMID: 25417656.
- 595 13. Te Velthuis AJ, Robb NC, Kapanidis AN, Fodor E. The role of the priming loop in  
596 influenza A virus RNA synthesis. *Nat Microbiol.* 2016;1:16029. doi: 10.1038/nmicrobiol.2016.29.  
597 PubMed PMID: 27572643.

- 598 14. Cros JF, Palese P. Trafficking of viral genomic RNA into and out of the nucleus:  
599 influenza, Thogoto and Borna disease viruses. *Virus Res.* 2003;95(1-2):3-12. PubMed PMID:  
600 12921991.
- 601 15. Whittaker G, Bui M, Helenius A. The role of nuclear import and export in influenza virus  
602 infection. *Trends Cell Biol.* 1996;6(2):67-71. PubMed PMID: 15157497.
- 603 16. Wu WW, Weaver LL, Pante N. Ultrastructural analysis of the nuclear localization  
604 sequences on influenza A ribonucleoprotein complexes. *J Mol Biol.* 2007;374(4):910-6. doi:  
605 10.1016/j.jmb.2007.10.022. PubMed PMID: 17976646.
- 606 17. Palese P, Shaw ML. *Orthomyxoviridae: The Viruses and Their Replication.* Fields  
607 Virology, 6th Edition: Lippincott Williams & Wilkins; 2013. 2456 p.
- 608 18. Lee N, Le Sage V, Nanni AV, Snyder DJ, Cooper VS, Lakdawala SS. Genome-wide  
609 analysis of influenza viral RNA and nucleoprotein association. *Nucleic Acids Res.*  
610 2017;45(15):8968-77. doi: 10.1093/nar/gkx584. PubMed PMID: 28911100; PubMed Central  
611 PMCID: PMC5587783.
- 612 19. Lee FCY, Ule J. Advances in CLIP Technologies for Studies of Protein-RNA  
613 Interactions. *Mol Cell.* 2018;69(3):354-69. Epub 2018/02/06. doi: 10.1016/j.molcel.2018.01.005.  
614 PubMed PMID: 29395060.
- 615 20. Hafner M, Landthaler M, Burger L, Khorshid M, Hausser J, Berninger P, et al.  
616 Transcriptome-wide identification of RNA-binding protein and microRNA target sites by PAR-  
617 CLIP. *Cell.* 2010;141(1):129-41. doi: 10.1016/j.cell.2010.03.009. PubMed PMID: 20371350;  
618 PubMed Central PMCID: PMC2861495.
- 619 21. Williams GD, Townsend D, Wylie KM, Kim PJ, Amarasinghe GK, Kutluay SB, et al.  
620 Nucleotide resolution mapping of influenza A virus nucleoprotein-RNA interactions reveals RNA  
621 features required for replication. *Nat Commun.* 2018;9(1):465. Epub 2018/02/02. doi:  
622 10.1038/s41467-018-02886-w. PubMed PMID: 29386621; PubMed Central PMCID:  
623 PMC5792457.
- 624 22. Baudin F, Bach C, Cusack S, Ruigrok RW. Structure of influenza virus RNP. I. Influenza  
625 virus nucleoprotein melts secondary structure in panhandle RNA and exposes the bases to the  
626 solvent. *EMBO J.* 1994;13(13):3158-65. PubMed PMID: 8039508; PubMed Central PMCID:  
627 PMC395207.
- 628 23. Yamanaka K, Ishihama A, Nagata K. Reconstitution of influenza virus RNA-  
629 nucleoprotein complexes structurally resembling native viral ribonucleoprotein cores. *J Biol*  
630 *Chem.* 1990;265(19):11151-5. Epub 1990/07/05. PubMed PMID: 2358455.
- 631 24. Li G, Reinberg D. Chromatin higher-order structures and gene regulation. *Curr Opin*  
632 *Genet Dev.* 2011;21(2):175-86. Epub 2011/02/24. doi: 10.1016/j.gde.2011.01.022. PubMed  
633 PMID: 21342762; PubMed Central PMCID: PMC3124554.
- 634 25. Kadauke S, Blobel GA. Chromatin loops in gene regulation. *Biochim Biophys Acta.*  
635 2009;1789(1):17-25. Epub 2008/08/05. doi: 10.1016/j.bbagr.2008.07.002. PubMed PMID:  
636 18675948; PubMed Central PMCID: PMC2638769.
- 637 26. Cobbin JC, Ong C, Verity E, Gilbertson BP, Rockman SP, Brown LE. Influenza virus  
638 PB1 and neuraminidase gene segments can cosegregate during vaccine reassortment driven  
639 by interactions in the PB1 coding region. *J Virol.* 2014;88(16):8971-80. Epub 2014/05/30. doi:  
640 10.1128/JVI.01022-14. PubMed PMID: 24872588; PubMed Central PMCID: PMC4136297.
- 641 27. Majarian TD, Murphy RF, Lakdawala SS. Learning the sequence of influenza A genome  
642 assembly during viral replication using point process models and fluorescence in situ  
643 hybridization. *PLoS Comput Biol.* 2019;15(1):e1006199. Epub 2019/01/29. doi:  
644 10.1371/journal.pcbi.1006199. PubMed PMID: 30689627; PubMed Central PMCID:  
645 PMC6366722.
- 646 28. Nturibi E, Bhagwat AR, Coburn S, Myerburg MM, Lakdawala SS. Intracellular  
647 Colocalization of Influenza Viral RNA and Rab11A Is Dependent upon Microtubule Filaments. *J*

- 648 Virol. 2017;91(19). Epub 2017/07/21. doi: 10.1128/JVI.01179-17. PubMed PMID: 28724771;  
649 PubMed Central PMCID: PMC5599730.
- 650 29. Lakdawala SS, Lee N, Brooke CB. Teaching an Old Virus New Tricks: A Review on New  
651 Approaches to Study Age-Old Questions in Influenza Biology. *J Mol Biol.* 2019. Epub  
652 2019/05/06. doi: 10.1016/j.jmb.2019.04.038. PubMed PMID: 31051174.
- 653 30. Lakdawala SS, Shih AR, Jayaraman A, Lamirande EW, Moore I, Paskel M, et al.  
654 Receptor specificity does not affect replication or virulence of the 2009 pandemic H1N1  
655 influenza virus in mice and ferrets. *Virology.* 2013;446(1-2):349-56. doi:  
656 10.1016/j.virol.2013.08.011. PubMed PMID: 24074599; PubMed Central PMCID:  
657 PMC3810034.
- 658 31. Reed LJ, Muench H. A SIMPLE METHOD OF ESTIMATING FIFTY PER CENT  
659 ENDPOINTS. *American Journal of Epidemiology.* 1938;27(3):5. doi: doi:  
660 10.1093/oxfordjournals.aje.a118408.
- 661 32. Moore MJ, Zhang C, Gantman EC, Mele A, Darnell JC, Darnell RB. Mapping Argonaute  
662 and conventional RNA-binding protein interactions with RNA at single-nucleotide resolution  
663 using HITS-CLIP and CIMS analysis. *Nat Protoc.* 2014;9(2):263-93. doi:  
664 10.1038/nprot.2014.012. PubMed PMID: 24407355; PubMed Central PMCID:  
665 PMC4156013.
- 666 33. Shah A, Qian Y, Weyn-Vanhentenryck SM, Zhang C. CLIP Tool Kit (CTK): a flexible and  
667 robust pipeline to analyze CLIP sequencing data. *Bioinformatics.* 2017;33(4):566-7. Epub  
668 2016/11/01. doi: 10.1093/bioinformatics/btw653. PubMed PMID: 27797762.  
669
